# Supplementary material for: Postoperative Dysphagia and Short-term Outcomes Following Laparoscopic Floppy Nissen Fundoplication Combined with V-flap Suturing
Source: Research Square preprint supplement (doi:10.21203/rs.3.rs-7178498/v1), 2025-09-01
Supplement: Supplementary file 1 [file 676443b20ec677b9c7916007.xlsx]

## Sheet: Sheet1
姓名	分组	腹胀	腹泻	便秘	嗳气
娄景咴	1	1	0	0	0
裴旺	1	0	0	0	0
庄树民	1	0	0	1	1
朱春菊	1	0	0	0	0
林爱勤	1	0	0	0	0
石亚定	1	0	0	0	0
阴素芬	1	0	0	0	0
师二奇	1	0	0	1	0
佘艳平	1	0	0	0	1
李士良	1	0	0	0	0
刘婷婷	1	0	0	0	0
虞新华	1	0	0	0	0
冯婷婷	1	0	0	0	1
赵玉平	1	0	0	0	0
董立强	1	0	0	0	0
夏华利	1	0	0	0	1
王守霞	1	1	0	0	1
梁学义	1	0	0	0	0
李荣俭	1	1	0	0	0
孙永明	1	0	0	0	0
刘慧	1	0	1	0	0
张红英	1	0	0	0	1
吁有花	1	0	0	0	0
王维伟	1	0	0	0	0
陈伟芹	1	0	0	0	0
田丰	1	0	0	0	0
王春起	1	0	0	0	0
刘力	1	0	0	0	0
李吉虎	1	0	0	0	0
张安平	1	1	0	0	0
魏凯歌	1	0	0	0	0
赵光明	1	0	0	0	0
段福林	1	0	0	0	0
范林霞	1	0	1	0	0
安建平	1	0	0	1	0
彭芳	1	0	0	0	0
袁露溪	1	1	0	0	0
康燕燕	1	0	0	0	0
焦海英	1	0	0	0	0
常先录	1	0	0	0	0
闫雅红	1	0	0	0	0
潘云安	1	0	1	0	0
顾梅英	1	0	0	1	0
高振国	1	0	0	0	0
戴甄	1	0	0	0	1
高雨欣	1	0	0	0	1
高振平	1	0	0	0	0
姜建军	1	0	1	0	0
应春婷	1	0	0	0	0
陈银昌	1	0	0	0	0
于雁	1	0	0	0	0
李新平	1	0	0	1	0
吴进旺	1	0	0	0	0
涂志勇	1	0	0	0	0
杨东卫	1	0	0	0	1
李春岩	1	0	0	0	0
米国江	1	0	0	0	0
田玉波	1	0	0	0	0
李佳	1	0	0	0	0
吕东建	1	0	0	0	0
吕嘉烨	1	0	0	0	0
张秀英	1	0	0	0	0
谢金霞	1	0	0	1	0
王帅	1	0	0	1	1
张勤	1	0	0	0	1
丑翠云	1	0	0	0	0
金士静	1	0	0	0	0
李和平	1	0	0	0	0
张晓红	1	0	0	0	0
郑义才	1	0	0	0	0
许米英	1	0	0	0	0
张美君	1	0	1	0	0
王惠珍	1	0	0	0	1
王培兰	1	0	0	0	0
赵范忠	1	0	0	0	0
燕语亮	1	0	0	0	0
宋帅	1	0	0	0	0
唐志鹏	1	0	0	0	0
闫秀芬	1	0	0	0	1
孔瑞金	1	0	1	0	1
张雪梅	1	0	1	0	0
董桂芬	1	1	0	0	0
钟红梅	1	0	0	0	0
夏日红	1	0	0	0	1
代文章	1	0	0	0	0
苗芳	1	0	0	0	1
奈德凤	1	0	0	0	1
侯淑芬	1	0	0	1	0
苑辉	1	0	0	0	0
赵金梅	1	0	0	0	0
彭文广	1	0	0	0	0
贾德玲	1	0	0	0	0
李明香	1	0	0	0	0
袁然	1	0	0	1	1
庞岩	1	0	0	0	0
张云红	1	0	0	0	0
刘换芹	1	0	0	0	0
高会清	1	1	0	0	0
曾绍春	1	0	1	0	0
屈如心	1	1	0	0	0
刘德贤	1	1	0	0	0
赵玉凤	1	0	0	0	0
闫静	1	0	1	0	0
付文志	1	1	0	0	0
冯国良	1	1	0	0	0
王继全	1	0	0	0	0
王志强	1	0	1	1	0
宋强	1	0	1	0	1
王秀芝	1	0	0	0	0
王殿宝	1	0	0	0	0
赵文才	1	0	0	0	0
汪辉	1	0	0	0	1
李俊娥	1	0	0	0	0
薛鸿灏	0	0	0	0	0
王合心	0	1	0	0	0
孙广	0	1	0	0	0
郭文豪	0	0	0	1	0
高淑荣	0	0	0	0	0
李康	0	0	0	0	0
厉建理	0	0	0	0	0
刘福全	0	0	0	0	0
苏寅	0	0	0	0	0
李俊生	0	0	0	1	1
张美霞	0	0	0	0	0
刘冠良	0	0	0	0	0
鲁玉华	0	0	0	0	1
辛桂荣	0	0	0	0	0
孟玉伶	0	0	0	0	1
常国刚	0	0	1	0	0
陈彩娟	0	0	0	0	0
赵连英	0	0	0	0	0
王宇红	0	1	0	0	1
廉白松	0	0	0	0	0
胡金涛	0	0	0	0	0
曹改娃	0	0	0	1	0
朱雯	0	0	1	0	0
戴雨横	0	0	0	0	0
赫存印	0	0	0	0	0
梁宏蕴	0	1	0	0	0
潘桂琴	0	0	0	0	0
单凤霞	0	0	1	0	0
李明	0	1	0	0	0
周培杰	0	0	0	0	0
冯飞	0	0	0	0	0
董国刚	0	0	0	0	0
金素花	0	0	0	0	0
王小芳	0	0	0	0	1
赵荣	0	0	0	0	0
高崇香	0	0	0	0	0
刘连旺	0	0	0	0	0
罗振红	0	0	0	0	0
张代响	0	0	0	0	1
王桂芬	0	0	0	0	0
郁龙	0	1	0	0	0
田得喜	0	0	0	0	0
丁治良	0	0	0	0	0
刘静	0	0	0	0	0
贾利强	0	0	0	1	0
丛桂芹	0	0	0	0	0
李淑宏	0	0	0	0	0
周路旺	0	0	0	1	0
张长安	0	0	0	0	1
海德华	0	0	0	0	0
卞景朋	0	0	0	1	1
夏凤玲	0	0	0	0	0
马连银	0	1	0	0	0
宋克元	0	0	0	0	0
郝凤香	0	0	1	0	0
刘秀阁	0	0	0	0	0
马艳君	0	0	0	0	0
王燕	0	0	0	1	0
王攀	0	1	0	0	0
唐建崑	0	0	0	0	0
