# Supplementary material for: Postoperative Dysphagia and Short-term Outcomes Following Laparoscopic Floppy Nissen Fundoplication Combined with V-flap Suturing
Source: Research Square preprint supplement (doi:10.21203/rs.3.rs-7178498/v1), 2025-09-01
Supplement: Supplementary file 2 [file 8a78a290e385c8f844902ebf.xlsx]

## Sheet: Sheet1
姓名	组别	手术时间min	出血量ml	术后排气时间（小时）	住院时间d
娄景咴	1	85	11	30	7
裴旺	1	196	30	45	7
庄树民	1	176	17	36	8
朱春菊	1	162	22	38	7
林爱勤	1	75	11	25	8
石亚定	1	221	11	57	8
阴素芬	1	77	19	40	7
师二奇	1	171	25	24	7
佘艳平	1	114	35	24	8
李士良	1	98	9	33	7
刘婷婷	1	75	7	33	7
虞新华	1	185	6	60	14
冯婷婷	1	81	27	39	8
赵玉平	1	80	25	24	7
董立强	1	151	5	37	7
夏华利	1	170	15	44	7
王守霞	1	166	15	40	7
梁学义180	1	133	23	33	7
李荣俭	1	75	8	42	7
孙永明	1	131	5	24	7
刘慧	1	75	6	40	7
张红英	1	146	34	52	13
吁有花	1	153	23	63	7
王维伟	1	137	19	29	11
陈伟芹	1	84	17	49	7
田丰	1	175	12	57	8
王春起	1	150	17	24	7
刘力	1	75	20	24	7
李吉虎	1	75	21	24	7
张安平	1	145	20	31	8
魏凯歌	1	105	7	42	7
赵光明	1	75	14	24	7
段福林	1	113	25	42	7
范林霞	1	76	9	30	7
安建平	1	154	20	24	8
彭芳	1	127	20	50	8
袁露溪	1	131	20	40	8
康燕燕	1	75	29	34	7
焦海英	1	75	15	40	7
常先录	1	143	15	24	8
闫雅红	1	145	14	36	7
潘云安	1	75	18	48	8
顾梅英	1	137	11	24	9
高振国	1	81	17	31	7
戴甄	1	90	14	34	7
高雨欣	1	118	20	41	8
高振平	1	230	11	24	7
姜建军	1	171	19	35	7
应春婷	1	75	16	24	8
陈银昌	1	157	7	24	7
于雁	1	143	18	42	7
李新平	1	148	7	24	10
吴进旺	1	139	30	33	8
涂志勇	1	123	9	43	8
杨东卫	1	75	40	38	7
李春岩	1	80	13	34	8
米国江	1	143	39	33	5
田玉波	1	151	14	35	12
李佳	1	150	20	25	7
吕东建	1	144	15	48	8
吕嘉烨	1	75	18	24	7
张秀英	1	119	5	54	7
谢金霞	1	194	12	26	8
王帅	1	75	6	44	7
张勤	1	157	16	43	8
丑翠云	1	252	13	38	7
金士静	1	132	5	36	7
李和平	1	144	17	43	7
张晓红	1	177	20	50	8
郑义才	1	127	19	48	7
许米英	1	181	13	24	7
张美君	1	75	30	31	7
王惠珍	1	108	17	29	7
王培兰	1	241	5	35	8
赵范忠	1	232	13	36	7
燕语亮	1	202	11	34	7
宋帅	1	185	26	39	7
唐志鹏	1	88	19	49	7
闫秀芬	1	125	9	24	7
孔瑞金	1	188	15	48	7
张雪梅	1	149	17	40	8
董桂芬	1	174	5	45	8
钟红梅	1	200	22	46	7
夏日红	1	141	8	47	7
代文章	1	121	19	45	7
苗芳	1	126	14	37	7
奈德凤	1	157	12	24	7
侯淑芬	1	158	12	48	7
苑辉	1	110	22	44	7
赵金梅	1	75	7	44	7
彭文广	1	156	5	41	7
贾德玲	1	123	12	49	7
李明香	1	103	12	41	7
袁然	1	120	5	43	8
庞岩	1	114	13	41	7
张云红	1	75	7	48	7
刘换芹	1	180	16	51	7
高会清	1	171	24	24	7
曾绍春	1	159	7	52	8
屈如心	1	220	18	34	8
刘德贤	1	78	26	42	7
赵玉凤	1	149	13	36	7
闫静	1	177	5	32	7
付文志	1	130	17	37	7
冯国良	1	147	29	37	7
王继全	1	107	25	47	6
王志强	1	167	31	37	8
宋强	1	100	12	24	7
王秀芝	1	123	5	49	7
王殿宝	1	245	18	38	7
赵文才	1	203	19	38	7
汪辉	1	127	17	34	7
李俊娥	1	86	14	33	7
薛鸿灏	0	120	10	48	7
王合心	0	112	15	36	7
孙广	0	115	20	24	7
郭文豪	0	100	15	36	8
高淑荣	0	95	25	24	8
李康	0	80	15	36	7
厉建理	0	120	20	48	7
刘福全	0	135	25	24	7
苏寅	0	110	15	24	7
李俊生	0	100	25	36	8
张美霞	0	95	20	36	7
刘冠良	0	160	15	24	10
鲁玉华	0	180	25	24	7
辛桂荣	0	95	20	36	7
孟玉伶	0	110	20	24	8
常国刚	0	120	25	36	9
陈彩娟	0	95	25	24	7
赵连英	0	105	15	24	8
王宇红	0	100	15	36	7
廉白松	0	90	25	36	8
胡金涛	0	110	20	24	7
曹改娃	0	132	10	36	8
朱雯	0	140	5	48	7
戴雨横	0	95	10	24	7
赫存印	0	115	15	36	7
梁宏蕴	0	90	10	24	8
潘桂琴	0	90	15	24	7
单凤霞	0	80	20	24	8
李明	0	75	15	24	8
周培杰	0	90	10	24	7
冯飞	0	100	5	36	7
董国刚	0	120	25	36	8
金素花	0	75	10	24	7
王小芳	0	85	15	24	7
赵荣	0	90	15	36	7
高崇香	0	110	20	24	7
刘连旺	0	105	20	36	8
罗振红	0	95	15	24	7
张代响	0	85	10	24	8
王桂芬	0	120	25	36	7
郁龙	0	135	25	48	7
田得喜	0	160	20	48	7
丁治良	0	150	20	48	7
刘静	0	85	10	24	8
贾利强	0	95	10	24	11
丛桂芹	0	105	15	24	7
李淑宏	0	75	10	36	7
周路旺	0	80	5	24	7
张长安	0	90	5	24	6
海德华	0	100	10	36	7
卞景朋	0	105	10	36	8
夏凤玲	0	85	10	24	7
马连银	0	75	5	24	7
宋克元	0	105	10	10	7
郝凤香	0	85	5	24	7
刘秀阁	0	90	20	24	7
马艳君	0	95	20	36	7
王燕	0	105	10	36	7
王攀	0	90	15	24	5
唐建崑	0	80	10	24	7
