# Supplementary material for: Postoperative Dysphagia and Short-term Outcomes Following Laparoscopic Floppy Nissen Fundoplication Combined with V-flap Suturing
Source: Research Square preprint supplement (doi:10.21203/rs.3.rs-7178498/v1), 2025-09-01
Supplement: Supplementary file 3 [file 923ff32e44b1e23ca8e86a4a.xlsx]

## Sheet: Sheet1
姓名	组别	Saeed评分 术前	Saeed评分（术后1月）	术后3月Saeed评分	术后6个月Saeed评分	术后1年Saeed评分
娄景咴	1	4	3	4	4	5
裴旺	1	5	3	4	4	5
庄树民	1	5	4	4	5	5
朱春菊	1	5	4	5	5	5
林爱勤	1	5	5	5	5	5
石亚定	1	5	3	5	5	5
阴素芬	1	5	4	4	5	5
师二奇	1	5	5	5	5	5
佘艳平	1	5	5	5	5	5
李士良	1	5	4	4	5	5
刘婷婷	1	5	5	5	5	4
虞新华	1	4	5	5	5	5
冯婷婷	1	5	5	5	5	5
赵玉平	1	5	3	4	5	5
董立强	1	5	4	4	5	5
夏华利	1	5	2	2	5	5
王守霞	1	5	5	5	5	5
梁学义180	1	4	5	5	5	5
李荣俭	1	5	4	4	5	5
孙永明	1	5	4	5	5	5
刘慧	1	5	3	3	5	5
张红英	1	5	5	5	5	5
吁有花	1	5	4	4	5	5
王维伟	1	5	4	4	5	5
陈伟芹	1	5	3	5	5	5
田丰	1	5	3	5	5	5
王春起	1	5	3	5	5	5
刘力	1	5	4	5	5	5
李吉虎	1	5	3	4	5	5
张安平	1	5	3	5	5	4
魏凯歌	1	5	3	4	5	5
赵光明	1	5	3	4	5	5
段福林	1	5	5	5	5	5
范林霞	1	5	3	5	5	5
安建平	1	5	3	4	5	5
彭芳	1	5	4	4	5	5
袁露溪	1	5	4	4	5	5
康燕燕	1	5	3	4	5	5
焦海英	1	5	3	5	5	5
常先录	1	5	3	5	5	5
闫雅红	1	4	3	5	5	5
潘云安	1	5	2	4	5	5
顾梅英	1	5	3	4	5	4
高振国	1	5	5	5	5	5
戴甄	1	5	3	4	5	5
高雨欣	1	5	2	5	5	5
高振平	1	5	5	5	5	5
姜建军	1	5	2	4	5	5
应春婷	1	4	3	4	5	5
陈银昌	1	5	2	4	5	5
于雁	1	5	5	5	5	5
李新平	1	5	4	5	5	5
吴进旺	1	5	3	4	5	5
涂志勇	1	4	5	5	5	5
杨东卫	1	5	3	4	5	5
李春岩	1	5	3	5	5	5
米国江	1	5	2	3	5	5
田玉波	1	5	4	4	5	5
李佳	1	5	4	5	5	4
吕东建	1	5	2	2	5	5
吕嘉烨	1	5	4	5	5	5
张秀英	1	5	3	4	5	5
谢金霞	1	5	3	4	5	5
王帅	1	5	3	5	5	5
张勤	1	5	2	5	5	5
丑翠云	1	5	4	5	5	5
金士静	1	5	5	5	5	5
李和平	1	5	4	4	5	5
张晓红	1	5	5	5	5	5
郑义才	1	4	5	5	5	5
许米英	1	5	3	5	5	5
张美君	1	5	5	5	5	5
王惠珍	1	5	4	4	5	3
王培兰	1	5	4	4	5	5
赵范忠	1	5	4	5	5	5
燕语亮	1	4	4	5	5	5
宋帅	1	5	2	5	5	5
唐志鹏	1	5	4	4	5	5
闫秀芬	1	5	5	5	5	5
孔瑞金	1	5	4	4	5	5
张雪梅	1	5	2	4	5	5
董桂芬	1	5	4	4	5	5
钟红梅	1	5	3	4	5	5
夏日红	1	5	2	4	5	5
代文章	1	5	2	4	5	5
苗芳	1	5	3	5	5	5
奈德凤	1	5	4	5	5	5
侯淑芬	1	5	3	4	5	5
苑辉	1	5	2	4	5	5
赵金梅	1	5	5	5	5	5
彭文广	1	5	4	4	5	5
贾德玲	1	5	3	4	5	5
李明香	1	5	4	4	5	5
袁然	1	5	3	5	5	5
庞岩	1	5	4	5	5	5
张云红	1	5	2	4	5	5
刘换芹	1	5	2	5	5	5
高会清	1	5	2	4	5	5
曾绍春	1	5	4	5	5	4
屈如心	1	5	5	5	5	5
刘德贤	1	4	3	5	5	3
赵玉凤	1	5	5	5	5	5
闫静	1	5	2	4	5	4
付文志	1	5	3	4	5	5
冯国良	1	5	5	5	5	5
王继全	1	5	3	5	5	4
王志强	1	5	3	4	5	5
宋强	1	5	3	4	5	5
王秀芝	1	5	2	5	5	4
王殿宝	1	5	2	4	5	4
赵文才	1	5	4	4	5	4
汪辉	1	5	2	2	5	4
李俊娥	1	5	3	5	5	5
薛鸿灏	0	5	2	3	4	4
王合心	0	5	2	3	4	4
孙广	0	5	2	3	4	5
郭文豪	0	4	3	3	4	5
高淑荣	0	5	3	4	5	5
李康	0	5	3	4	5	5
厉建理	0	5	3	4	5	5
刘福全	0	5	3	4	5	5
苏寅	0	5	3	4	5	5
李俊生	0	4	3	4	5	4
张美霞	0	5	3	4	5	5
刘冠良	0	5	3	4	5	5
鲁玉华	0	5	3	4	5	5
辛桂荣	0	5	3	4	5	5
孟玉伶	0	5	3	4	5	5
常国刚	0	5	3	4	5	5
陈彩娟	0	5	4	5	5	5
赵连英	0	5	3	4	5	5
王宇红	0	5	3	4	5	5
廉白松	0	5	2	3	4	5
胡金涛	0	5	3	4	4	5
曹改娃	0	5	2	3	4	5
朱雯	0	5	3	4	5	5
戴雨横	0	5	3	4	5	5
赫存印	0	5	3	4	5	5
梁宏蕴	0	5	3	4	5	5
潘桂琴	0	5	3	4	5	5
单凤霞	0	5	3	4	5	4
李明	0	5	3	4	5	5
周培杰	0	5	2	3	4	5
冯飞	0	5	2	3	4	5
董国刚	0	5	2	3	4	5
金素花	0	5	3	4	5	5
王小芳	0	5	3	4	5	5
赵荣	0	5	4	5	5	5
高崇香	0	5	2	3	5	5
刘连旺	0	5	2	3	5	5
罗振红	0	5	2	3	5	4
张代响	0	4	2	3	5	5
王桂芬	0	5	4	5	5	5
郁龙	0	5	2	3	4	5
田得喜	0	5	2	3	4	5
丁治良	0	5	3	4	5	5
刘静	0	5	3	4	5	5
贾利强	0	5	3	4	5	4
丛桂芹	0	5	4	5	4	5
李淑宏	0	5	4	4	5	5
周路旺	0	5	4	4	5	5
张长安	0	5	3	3	4	5
海德华	0	5	4	4	5	5
卞景朋	0	5	4	4	5	5
夏凤玲	0	5	4	4	5	5
马连银	0	5	4	4	5	5
宋克元	0	5	2	3	4	5
郝凤香	0	5	2	3	4	5
刘秀阁	0	5	4	4	5	5
马艳君	0	5	4	4	5	4
王燕	0	5	4	3	4	5
王攀	0	5	2	3	4	5
唐建崑	0	5	2	3	4	5
