# Supplementary material for: Postoperative Dysphagia and Short-term Outcomes Following Laparoscopic Floppy Nissen Fundoplication Combined with V-flap Suturing
Source: Research Square preprint supplement (doi:10.21203/rs.3.rs-7178498/v1), 2025-09-01
Supplement: Supplementary file 4 [file 927fda3a8e0310878de0d04d.xlsx]

## Sheet: Sheet1
姓名	组别	性别	年龄	身高（cm）	体重（Kg）	BMI	反流性食管炎有无	反流性食管炎（内镜）	Barrett食管	食管裂孔疝（术前检出）	症状持续时间（月）	LES	DeMeester	Saeed评分 术前	GERD-Q评分术前
娄景咴	1	1	44	172	62	21	1	2	0	1	19	6.2	18	4	12
裴旺	1	1	53	160	56	21.9	1	2	0	1	36	5.9	24.2	5	11
庄树民	1	1	67	162	69	26.3	0	0	0	1	7	7.3	22.9	5	9
朱春菊	1	2	69	155	56	23.3	0	0	0	1	24	12.8	26	5	13
林爱勤	1	2	54	150	50	22.2	0	0	0	1	12	8.9	19.8	5	11
石亚定	1	2	48	155	66	27.5	1	1	0	1	15	12.9	24.8	5	11
阴素芬	1	2	60	155	60	25	0	0	0	1	84	3	14.4	5	8
师二奇	1	1	73	165	60.7	22.3	1	1	0	0	120	11.6	22.7	5	12
佘艳平	1	2	58	158	75	30	0	0	0	0	6	14.8	27.5	5	11
李士良	1	1	69	170	72.8	25.2	1	1	0	0	48	8.1	20	5	15
刘婷婷	1	2	36	162	67.5	25.7	1	1	0	1	9	16.9	17.9	5	10
虞新华	1	1	40	167	68	24.3	0	0	0	0	36	6.1	21.4	4	8
冯婷婷	1	2	38	165	48	17.3	1	1	0	1	12	7.6	19.5	5	15
赵玉平	1	2	60	168	71	25.1	1	2	0	1	60	3	15.7	5	15
董立强	1	1	56	170	82	28.4	1	1	0	0	96	8.2	13.1	5	14
夏华利	1	1	59	168	67.5	23.9	0	0	0	0	18	5.3	24.8	5	9
王守霞	1	2	50	162	51	19.4	1	1	0	1	72	15.9	12.7	5	11
梁学义180	1	1	53	172	80	27	0	0	0	1	36	11.3	18.3	4	15
李荣俭	1	1	63	165	60	22	1	1	0	0	15	14.4	20.3	5	11
孙永明	1	1	44	177	67	21.4	1	1	1	1	24	15.3	16	5	11
刘慧	1	2	25	157	40	16.2	1	1	0	1	12	5.8	17.9	5	14
张红英	1	2	48	159	58	22.9	0	0	0	1	12	4.4	14.5	5	13
吁有花	1	2	49	155	55	22.9	1	2	0	1	36	14.7	20.1	5	13
王维伟	1	1	47	175	70	22.9	0	0	0	1	48	6.4	18.3	5	12
陈伟芹	1	2	52	158	62	24.8	0	0	1	1	84	10.6	22.4	5	13
田丰	1	1	57	164	83	30.9	1	1	0	1	36	7.9	15	5	9
王春起	1	1	67	168	59	20.9	1	1	0	1	36	9.7	19.4	5	9
刘力	1	2	56	161	66	25.5	1	1	0	1	60	8	15.8	5	14
李吉虎	1	1	28	172	52	17.6	1	1	0	1	72	10.8	20	5	8
张安平	1	1	52	170	55	19	1	1	0	1	120	7.6	25.5	5	15
魏凯歌	1	1	25	171	63	21.5	1	2	0	1	24	12.1	15.1	5	12
赵光明	1	1	41	174	66	21.8	1	1	0	1	36	6.9	16.1	5	13
段福林	1	1	51	167	50	17.9	0	0	0	1	8	12.4	21.1	5	13
范林霞	1	2	48	163	53	19.9	0	0	0	1	24	5.1	13.8	5	11
安建平	1	1	56	172	67	22.6	0	0	0	1	36	7.8	11.8	5	8
彭芳	1	2	39	162	54	20.6	1	2	0	0	72	6.2	20.1	5	10
袁露溪	1	2	31	155	44	18.3	1	1	0	1	120	10.2	18.4	5	12
康燕燕	1	2	39	159	62	24.5	1	1	0	1	36	7.5	22.8	5	9
焦海英	1	2	50	162	64	24.4	1	1	0	1	12	11.3	17.7	5	15
常先录	1	1	62	159	45	17.8	1	1	0	1	18	10.2	18.6	5	10
闫雅红	1	1	45	168	56	19.9	0	0	0	0	12	6.4	14.7	4	8
潘云安	1	1	52	150	54	24	0	0	0	0	84	7.5	18.4	5	13
顾梅英	1	2	48	158	70	28	1	2	0	0	12	9	17.8	5	13
高振国	1	1	59	170	66	22.8	0	0	0	1	180	8.2	19.2	5	8
戴甄	1	1	38	174	55	18.2	1	2	1	1	24	9.6	20.7	5	10
高雨欣	1	2	24	162	51	19.4	0	0	0	0	12	11	18.8	5	14
高振平	1	2	78	145	55	26.2	1	2	1	1	12	9.5	14.2	5	10
姜建军	1	1	52	167	70	25.1	0	0	0	1	36	12.6	18.3	5	10
应春婷	1	2	49	160	75	29.3	0	0	0	1	72	7	10.5	4	8
陈银昌	1	1	32	168	62	22	0	0	0	0	36	14	19.9	5	11
于雁	1	1	50	172	85	28.7	0	0	0	1	72	6.3	18.8	5	12
李新平	1	1	49	183	87	26	1	2	0	1	84	14.3	15.4	5	8
吴进旺	1	1	56	165	80	29.4	1	2	1	1	240	11.9	24.2	5	11
涂志勇	1	1	40	174	69	22.8	1	2	0	1	72	14.3	15.9	4	10
杨东卫	1	1	43	173	87	29.1	1	1	0	1	24	13.9	23	5	10
李春岩	1	1	58	174	76	25.1	1	1	0	1	36	14.7	13.5	5	12
米国江	1	1	57	176	59	19	1	1	0	1	36	5	23.4	5	13
田玉波	1	1	63	165	81	29.8	1	3	0	1	120	5.4	12.7	5	9
李佳	1	1	37	186	80	23	1	1	0	0	36	6.9	10	5	15
吕东建	1	1	37	175	88	28.7347	1	1	0	0	36	13.5	10	5	12
吕嘉烨	1	2	18	162	60	22.8624	1	1	0	1	60	18	14.8	5	10
张秀英	1	2	57	158	55	22.0317	1	1	0	1	48	7.6	17.1	5	11
谢金霞	1	2	62	155	60	24.974	1	2	0	1	12	6.3	15.4	5	13
王帅	1	1	30	170	75	25.9516	1	2	0	1	14	6.2	18.5	5	10
张勤	1	2	60	180	88.4	27.284	1	1	0	1	12	9.3	21.7	5	9
丑翠云	1	2	67	160	55	21.4844	1	1	0	1	84	10.4	18.1	5	8
金士静	1	2	60	158	55.2	22.1118	1	2	0	1	120	8.8	25.5	5	9
李和平	1	1	66	165	60	22.0386	1	1	0	1	120	7.5	17.4	5	8
张晓红	1	2	51	165	86.7	31.8457	1	2	0	1	60	11.2	21.8	5	9
郑义才	1	1	27	160	65	25.3906	0	0	0	1	72	11.1	16.4	4	12
许米英	1	2	54	158	65	26.0375	1	1	0	1	8	6.5	18	5	10
张美君	1	2	41	165	50	18.3655	0	0	0	1	24	6.8	16.8	5	10
王惠珍	1	2	59	165	53	19.4674	1	4	0	1	36	11.8	22.7	5	11
王培兰	1	2	51	160	59.2	23.125	1	1	0	1	24	14.3	16.5	5	12
赵范忠	1	1	64	158	40	16.0231	0	0	0	1	96	8.8	14.3	5	14
燕语亮	1	1	51	165	60	22.0386	0	0	0	1	19	11.5	10	4	15
宋帅	1	1	29	165	70	25.7117	1	1	0	1	9	11.4	16	5	13
唐志鹏	1	1	23	160	59	23.0469	1	1	0	0	12	6.9	19.6	5	12
闫秀芬	1	2	72	158	70	28.0404	0	0	0	1	12	6.2	17.4	5	13
孔瑞金	1	2	54	165	60	22.0386	0	0	0	1	216	9	17.6	5	13
张雪梅	1	2	47	165	72	26.4463	1	3	0	1	12	7.6	10	5	11
董桂芬	1	2	68	160	67	26.1719	1	1	0	1	12	11.7	15.9	5	14
钟红梅	1	2	54	158	49.4	19.7885	1	2	0	1	12	4.4	23.4	5	10
夏日红	1	2	62	165	69	25.3444	1	1	0	0	120	8.2	17.3	5	13
代文章	1	1	33	165	70	25.7117	1	1	0	1	6	11.9	20.1	5	11
苗芳	1	2	65	160	70	27.3437	0	0	0	0	24	8.8	19.6	5	13
奈德凤	1	1	67	158	55	22.0317	0	0	0	1	36	8.9	22.9	5	9
侯淑芬	1	2	60	165	74	27.1809	1	1	0	1	72	9.1	25.4	5	11
苑辉	1	1	46	165	70	25.7117	1	2	0	1	36	8.6	19.1	5	11
赵金梅	1	2	62	160	70	27.3437	1	2	0	1	12	8.7	20.8	5	15
彭文广	1	1	67	158	73	29.2421	0	0	0	1	120	9.8	14	5	15
贾德玲	1	2	56	165	63	23.1405	1	2	0	0	120	9.4	21.8	5	12
李明香	1	2	67	165	59	21.6713	1	2	0	1	13	6.5	19.5	5	8
袁然	1	1	41	160	58	22.6562	0	0	0	1	36	13.4	18.4	5	9
庞岩	1	1	57	158	61	24.4352	0	0	0	1	84	9.6	10.7	5	13
张云红	1	2	47	165	67	24.6097	1	2	0	1	48	10.8	16.6	5	9
刘换芹	1	2	54	165	47	17.2635	0	0	0	1	12	6	17.7	5	8
高会清	1	2	75	160	72	28.125	1	1	0	1	12	3.4	27.6	5	10
曾绍春	1	2	54	158	44	17.6254	0	0	0	1	36	8.5	32.9	5	8
屈如心	1	2	48	165	54.5	20.0184	1	1	0	1	60	11.3	17.9	5	9
刘德贤	1	1	63	165	55	20.202	1	2	0	1	36	3.9	16.5	4	11
赵玉凤	1	2	62	160	80	31.25	1	2	0	1	18	6.4	16.2	5	14
闫静	1	2	52	158	64	25.6369	1	1	0	1	120	7.6	18.4	5	13
付文志	1	1	68	165	75	27.5482	1	1	0	1	72	12.9	16	5	9
冯国良	1	1	68	165	80	29.3848	1	2	0	0	48	16.3	27.9	5	13
王继全	1	1	53	160	64	25	1	1	0	1	24	7.8	21.4	5	8
王志强	1	1	63	158	89	35.6513	1	2	0	1	12	12.4	10	5	8
宋强	1	1	46	165	74.7	27.438	0	0	0	1	12	10.6	18.5	5	10
王秀芝	1	2	58	165	88	32.3232	1	1	0	0	36	6.4	25	5	8
王殿宝	1	1	67	160	72.6	28.3594	0	0	0	0	98	12.6	16.3	5	12
赵文才	1	1	54	158	68.3	27.3594	0	0	0	0	6	11.4	13.1	5	14
汪辉	1	1	38	165	55	20.202	0	0	0	1	17	9.9	16.4	5	10
李俊娥	1	2	60	165	65	23.8751	0	0	0	1	223	8.6	18.8	5	15
薛鸿灏	0	1	24	168	67.5	23.9158	1	2	0	1	30	10.8	17.9	5	12
王合心	0	1	38	172	85	28.7317	0	0	0	1	15	11.4	18	5	13
孙广	0	1	38	171	67.5	23.084	0	0	0	1	12	12.3	14.9	5	10
郭文豪	0	1	25	185	70.4	20.5698	0	0	0	1	36	10.2	18.6	4	9
高淑荣	0	2	54	160	54	21.0937	1	2	0	1	18	6.7	18.3	5	11
李康	0	1	25	174	72.2	23.8473	1	1	0	1	24	12.3	9.4	5	9
厉建理	0	1	57	171	64.8	22.1607	1	1	0	1	72	14.7	24.5	5	7
刘福全	0	1	53	165	56	20.5693	1	1	0	1	84	8.5	28.9	5	9
苏寅	0	1	36	177	56	17.8748	1	1	0	0	20	3.3	18.2	5	10
李俊生	0	1	56	170	75	25.9516	1	2	1	1	48	4.5	18.3	4	12
张美霞	0	2	40	163	45.3	17.0499	1	1	0	0	9	10.5	16.7	5	15
刘冠良	0	1	28	177	61	19.4708	1	1	0	1	96	13.5	21.2	5	13
鲁玉华	0	2	67	164	62	23.0518	0	0	0	1	60	12.5	11.5	5	11
辛桂荣	0	2	59	158	58	23.2335	1	2	0	0	14	15	16.3	5	10
孟玉伶	0	2	69	160	60	23.4375	1	2	0	1	36	5.8	20.3	5	9
常国刚	0	1	58	164	86	31.975	1	1	0	1	10	8.7	15.4	5	12
陈彩娟	0	2	67	153	51	21.7865	1	2	0	1	60	6.9	16.9	5	8
赵连英	0	2	68	155	56	23.3091	1	1	0	1	108	14.5	22.1	5	11
王宇红	0	2	52	155	54	22.4766	0	0	0	0	32	13.5	23.6	5	9
廉白松	0	1	52	172	75	25.3515	1	1	0	1	24	16.5	29.3	5	10
胡金涛	0	1	62	162	60	22.8624	1	1	1	1	15	4.7	27.5	5	11
曹改娃	0	2	47	163	61	22.9591	1	1	0	1	18	5.5	22.4	5	8
朱雯	0	2	58	158	66	26.4381	1	2	1	1	48	4.7	17.8	5	6
戴雨横	0	1	32	183	75	22.3954	1	2	0	0	36	9.8	18.4	5	12
赫存印	0	1	58	170	76	26.2976	1	1	0	1	90	11.7	16.7	5	14
梁宏蕴	0	1	70	170	84	29.0657	1	1	1	1	42	10.5	18.9	5	9
潘桂琴	0	2	66	155	63	26.2227	1	2	0	1	33	9.3	15.2	5	13
单凤霞	0	2	61	157	75	30.4272	0	0	0	1	54	6.5	18.2	5	12
李明	0	1	38	170	90	31.1419	1	1	0	0	60	6.6	14.7	5	14
周培杰	0	1	50	168	89	31.5334	1	4	0	1	132	6.8	16	5	9
冯飞	0	1	32	165	58	21.3039	0	0	0	1	28	8.8	20.5	5	10
董国刚	0	1	60	168	60	21.2585	1	1	0	1	38	8.7	14.7	5	14
金素花	0	2	74	160	73	28.5156	1	1	0	1	20	16.5	11.2	5	11
王小芳	0	2	55	162	59.3	22.5956	1	1	0	0	24	13.6	16.7	5	12
赵荣	0	1	38	172	68	22.9854	0	0	0	1	40	8.9	20.9	5	9
高崇香	0	2	71	160	65	25.3906	0	0	0	0	72	7.8	14.3	5	11
刘连旺	0	1	59	160	60	23.4375	0	0	0	1	96	6.7	13.2	5	10
罗振红	0	1	33	178	76	23.9869	0	0	0	1	34	15.2	21.7	5	10
张代响	0	1	35	168	68	24.093	1	2	0	1	16	10.5	20.2	4	13
王桂芬	0	2	58	152	70	30.2978	1	1	0	1	22	7.8	23.5	5	12
郁龙	0	1	23	183	70	20.9024	0	0	0	0	12	8.6	17.8	5	8
田得喜	0	1	48	174	72	23.7812	1	3	0	1	78	8.3	18.5	5	12
丁治良	0	1	63	163	70	26.3465	0	0	0	1	14	3.4	14.7	5	10
刘静	0	2	60	158	54	21.6311	0	0	0	1	160	8.9	16.5	5	11
贾利强	0	1	28	186	78	22.546	0	0	0	1	25	10.5	15.8	5	8
丛桂芹	0	2	54	155	55	22.8928	0	0	0	1	12	11.3	14.7	5	11
李淑宏	0	2	73	150	60	26.6667	1	2	0	1	36	10.8	12.3	5	13
周路旺	0	1	35	170	75	25.9516	0	0	0	0	80	5.4	16.7	5	14
张长安	0	1	44	173	78	26.0617	1	1	0	1	30	8.7	25.4	5	12
海德华	0	1	64	165	75	27.5482	0	0	0	1	70	5.5	22.1	5	10
卞景朋	0	1	45	171	74	25.3069	1	1	0	1	88	13.2	24.5	5	8
夏凤玲	0	2	59	160	60	23.4375	1	2	0	1	210	6.5	12.3	5	12
马连银	0	1	51	162	77	29.34	1	1	0	1	66	9.8	17.8	5	14
宋克元	0	1	61	175	72	23.5102	1	2	0	1	28	11.9	14.8	5	13
郝凤香	0	2	62	145	62	29.4887	1	1	0	1	35	5.6	19.6	5	11
刘秀阁	0	2	77	152	46	19.91	0	0	0	1	39	9.9	18.2	5	10
马艳君	0	2	53	162	68	25.9107	1	1	0	1	110	10.6	18.9	5	9
王燕	0	2	48	156	52	21.3675	0	0	0	1	32	10.3	16.7	5	12
王攀	0	1	30	171	62	21.2031	1	1	1	0	34	4.9	20	5	14
唐建崑	0	2	45	159	78	30.8532	0	0	0	1	50	11	18	5	12
