# Supplementary material for: Postoperative Dysphagia and Short-term Outcomes Following Laparoscopic Floppy Nissen Fundoplication Combined with V-flap Suturing
Source: Research Square preprint supplement (doi:10.21203/rs.3.rs-7178498/v1), 2025-09-01
Supplement: Supplementary file 5 [file a7e93043308e5ff9ca97b880.xlsx]

## Sheet: Sheet1
姓名	组别	GERD-Q评分术前	术后3个月GERD-Q评分	术后6个月GERD-Q评分	术后1年GERD-Q评分
娄景咴	1	12	5	6	6
裴旺	1	11	4	4	5
庄树民	1	9	7	8	8
朱春菊	1	13	4	5	5
林爱勤	1	11	6	6	6
石亚定	1	11	5	6	6
阴素芬	1	8	4	5	5
师二奇	1	12	6	6	6
佘艳平	1	11	4	5	5
李士良	1	15	8	9	9
刘婷婷	1	10	4	4	4
虞新华	1	8	5	6	7
冯婷婷	1	15	6	7	8
赵玉平	1	15	6	6	7
董立强	1	14	4	5	5
夏华利	1	9	4	4	5
王守霞	1	11	7	8	8
梁学义180	1	15	5	6	7
李荣俭	1	11	4	5	6
孙永明	1	11	6	6	6
刘慧	1	14	5	6	6
张红英	1	13	5	6	6
吁有花	1	13	4	4	4
王维伟	1	12	4	5	5
陈伟芹	1	13	7	8	9
田丰	1	9	5	5	5
王春起	1	9	5	5	5
刘力	1	14	4	4	5
李吉虎	1	8	6	7	8
张安平	1	15	6	6	7
魏凯歌	1	12	8	8	8
赵光明	1	13	5	6	6
段福林	1	13	4	4	4
范林霞	1	11	7	8	8
安建平	1	8	5	5	5
彭芳	1	10	5	5	5
袁露溪	1	12	5	5	5
康燕燕	1	9	4	5	5
焦海英	1	15	5	6	6
常先录	1	10	4	4	5
闫雅红	1	8	5	6	7
潘云安	1	13	6	7	7
顾梅英	1	13	4	5	6
高振国	1	8	4	4	4
戴甄	1	10	7	7	7
高雨欣	1	14	4	4	5
高振平	1	10	5	6	6
姜建军	1	10	6	7	7
应春婷	1	8	8	9	9
陈银昌	1	11	6	6	7
于雁	1	12	4	5	6
李新平	1	8	7	8	8
吴进旺	1	11	5	6	7
涂志勇	1	10	4	5	5
杨东卫	1	10	4	5	5
李春岩	1	12	6	6	7
米国江	1	13	5	5	5
田玉波	1	9	4	5	6
李佳	1	15	5	6	6
吕东建	1	12	4	5	6
吕嘉烨	1	10	6	6	7
张秀英	1	11	4	4	4
谢金霞	1	13	5	6	6
王帅	1	10	7	8	8
张勤	1	9	4	4	5
丑翠云	1	8	4	4	4
金士静	1	9	5	5	5
李和平	1	8	8	8	9
张晓红	1	9	5	5	6
郑义才	1	12	5	5	6
许米英	1	10	4	5	5
张美君	1	10	6	6	5
王惠珍	1	11	5	6	7
王培兰	1	12	5	6	6
赵范忠	1	14	7	8	8
燕语亮	1	15	4	5	5
宋帅	1	13	5	6	6
唐志鹏	1	12	6	7	8
闫秀芬	1	13	4	5	6
孔瑞金	1	13	7	7	7
张雪梅	1	11	5	6	7
董桂芬	1	14	5	6	6
钟红梅	1	10	6	7	7
夏日红	1	13	4	4	5
代文章	1	11	5	6	7
苗芳	1	13	5	5	6
奈德凤	1	9	5	5	5
侯淑芬	1	11	4	5	5
苑辉	1	11	8	9	9
赵金梅	1	15	5	6	7
彭文广	1	15	4	5	5
贾德玲	1	12	7	8	8
李明香	1	8	6	7	8
袁然	1	9	4	5	5
庞岩	1	13	5	5	5
张云红	1	9	4	5	6
刘换芹	1	8	7	9	9
高会清	1	10	6	7	7
曾绍春	1	8	5	5	6
屈如心	1	9	5	5	5
刘德贤	1	11	5	5	5
赵玉凤	1	14	4	5	5
闫静	1	13	6	7	7
付文志	1	9	4	4	5
冯国良	1	13	7	8	8
王继全	1	8	5	5	6
王志强	1	8	4	5	5
宋强	1	10	8	9	9
王秀芝	1	8	5	6	7
王殿宝	1	12	6	6	7
赵文才	1	14	4	4	4
汪辉	1	10	5	6	7
李俊娥	1	15	4	5	6
薛鸿灏	0	12	7	8	8
王合心	0	13	6	7	6
孙广	0	10	7	8	8
郭文豪	0	9	8	9	8
高淑荣	0	11	6	6	7
李康	0	9	6	7	6
厉建理	0	7	8	8	9
刘福全	0	9	7	8	7
苏寅	0	10	5	5	5
李俊生	0	12	7	8	8
张美霞	0	15	5	5	5
刘冠良	0	13	5	6	6
鲁玉华	0	11	6	6	7
辛桂荣	0	10	5	6	5
孟玉伶	0	9	4	4	5
常国刚	0	12	6	7	7
陈彩娟	0	8	5	6	6
赵连英	0	11	4	5	4
王宇红	0	9	8	8	8
廉白松	0	10	6	6	8
胡金涛	0	11	6	6	7
曹改娃	0	8	4	5	5
朱雯	0	6	5	6	6
戴雨横	0	12	6	7	8
赫存印	0	14	4	4	4
梁宏蕴	0	9	6	6	6
潘桂琴	0	13	5	6	5
单凤霞	0	12	5	6	5
李明	0	14	5	6	5
周培杰	0	9	8	9	8
冯飞	0	10	6	6	6
董国刚	0	14	4	4	4
金素花	0	11	7	8	9
王小芳	0	12	4	4	5
赵荣	0	9	6	6	6
高崇香	0	11	4	4	5
刘连旺	0	10	6	6	6
罗振红	0	10	7	7	7
张代响	0	13	6	6	7
王桂芬	0	12	6	6	6
郁龙	0	8	5	5	5
田得喜	0	12	4	4	4
丁治良	0	10	5	6	6
刘静	0	11	5	5	6
贾利强	0	8	7	8	7
丛桂芹	0	11	6	6	7
李淑宏	0	13	6	7	7
周路旺	0	14	5	6	6
张长安	0	12	5	6	4
海德华	0	10	7	7	8
卞景朋	0	8	7	7	8
夏凤玲	0	12	7	7	9
马连银	0	14	5	5	6
宋克元	0	13	5	6	6
郝凤香	0	11	6	6	8
刘秀阁	0	10	7	7	7
马艳君	0	9	5	6	6
王燕	0	12	6	7	6
王攀	0	14	4	4	5
唐建崑	0	12	4	5	5
